# Supplementary material for: Using Genotyping-By-Sequencing (GBS) for Genomic Discovery in Cultivated Oat
Source: PubMed Central journal article supplement (PMC4105502; doi:10.1371/journal.pone.0102448), 2014-07-21

**1C**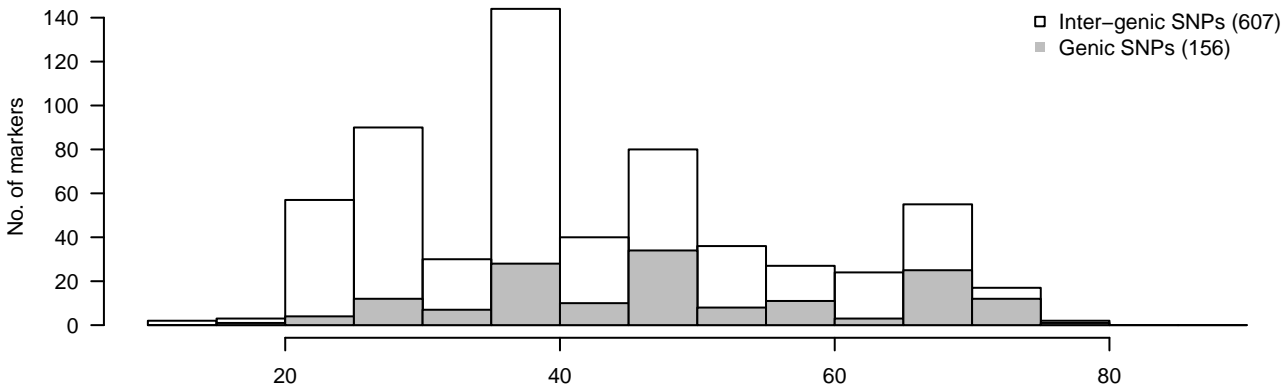**2C**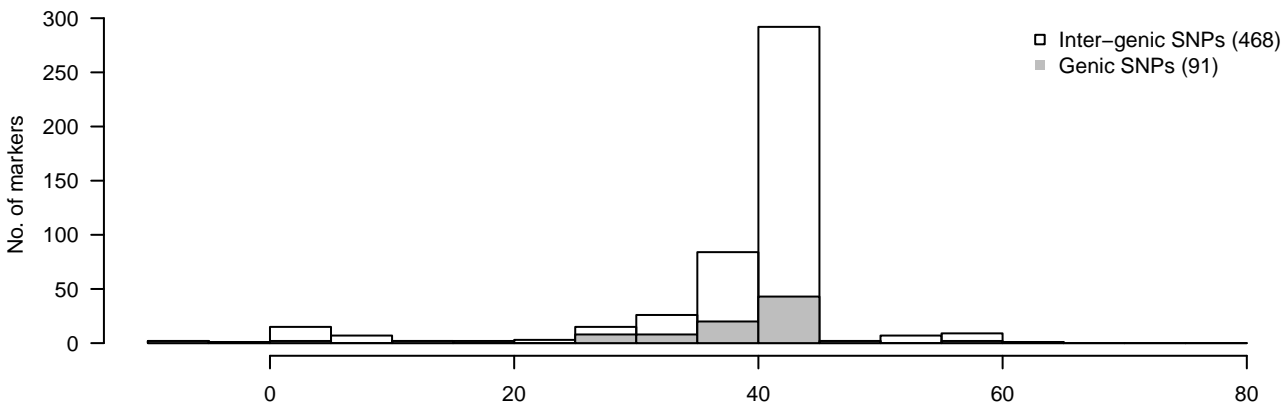**3C**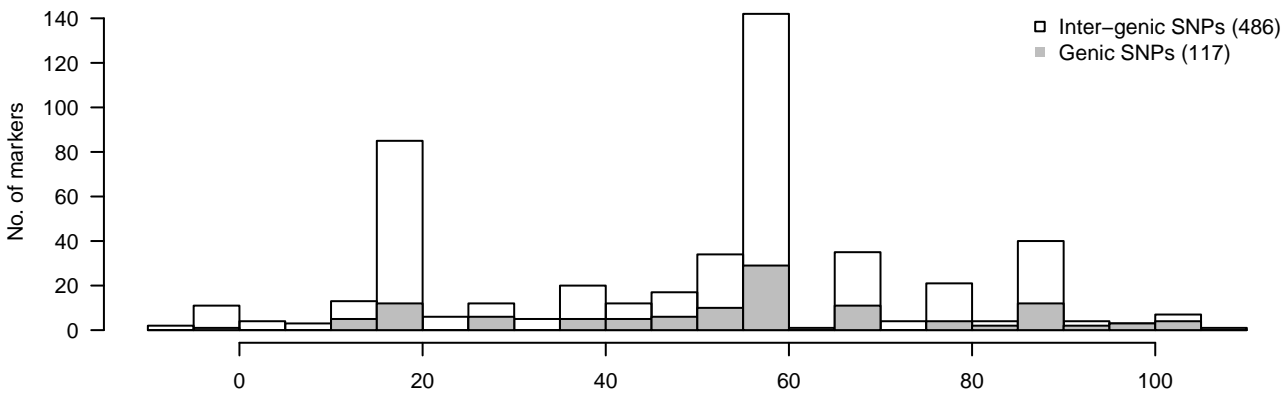

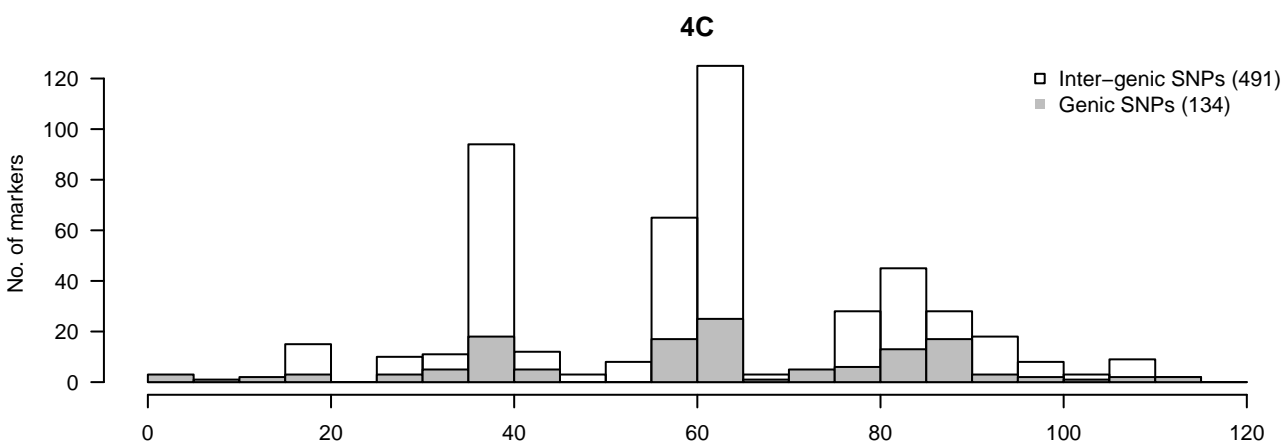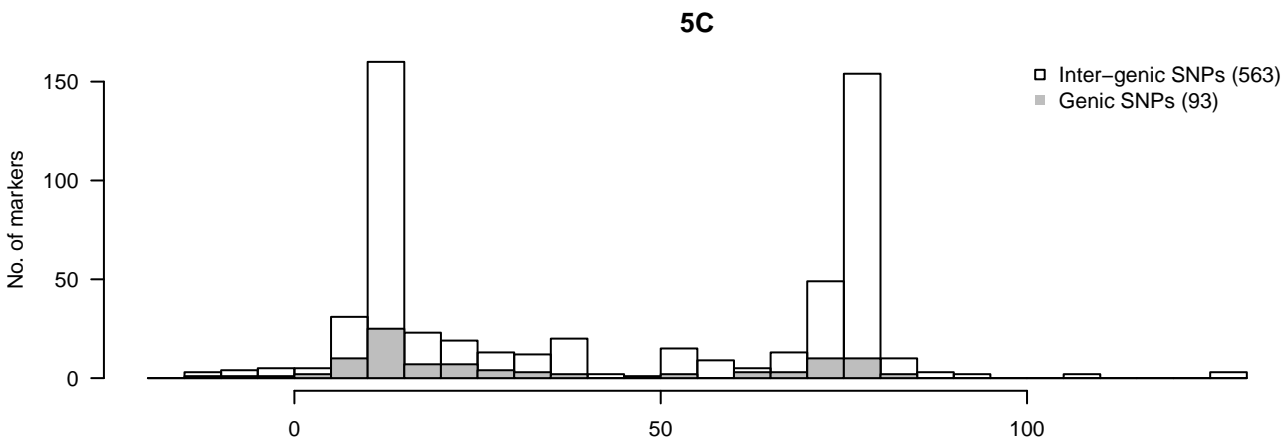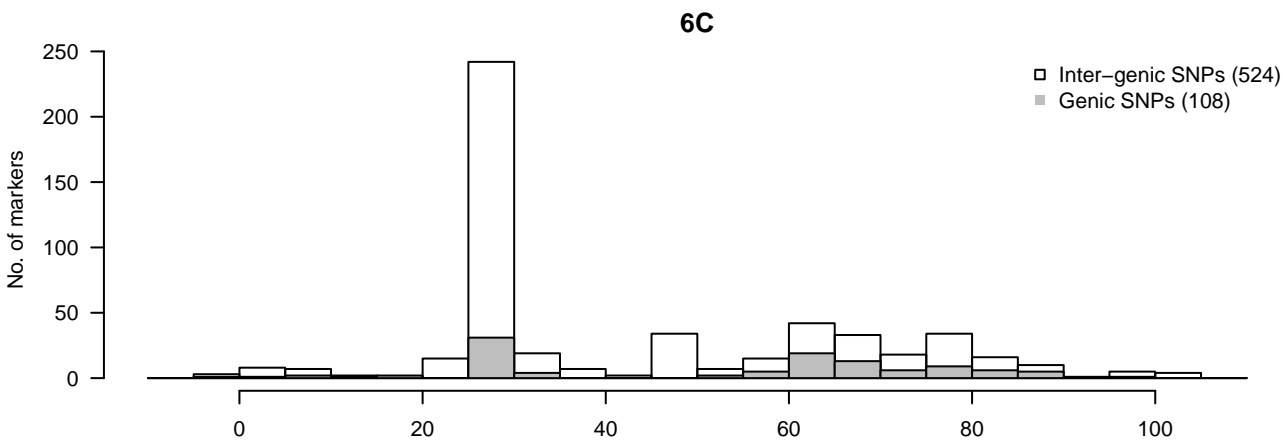

### 7C-17A

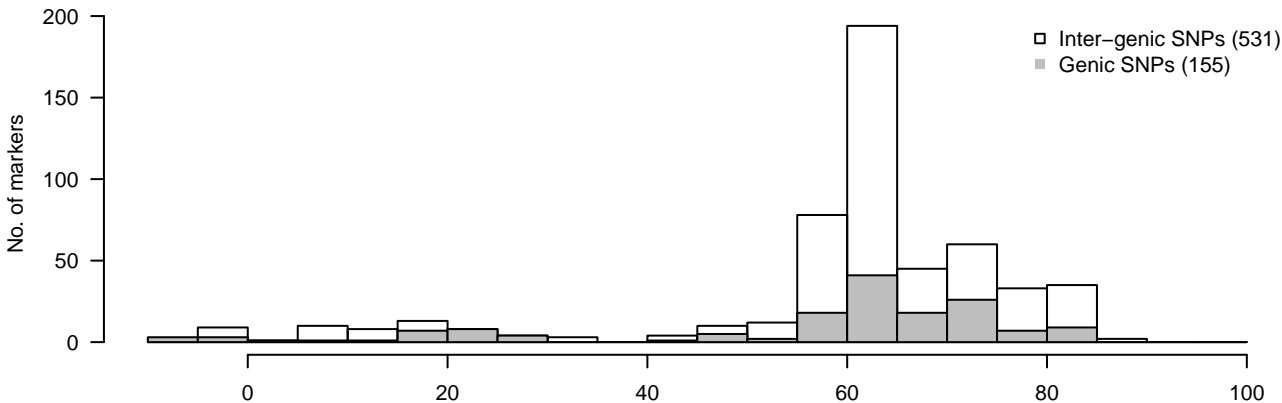

### 17A-7C

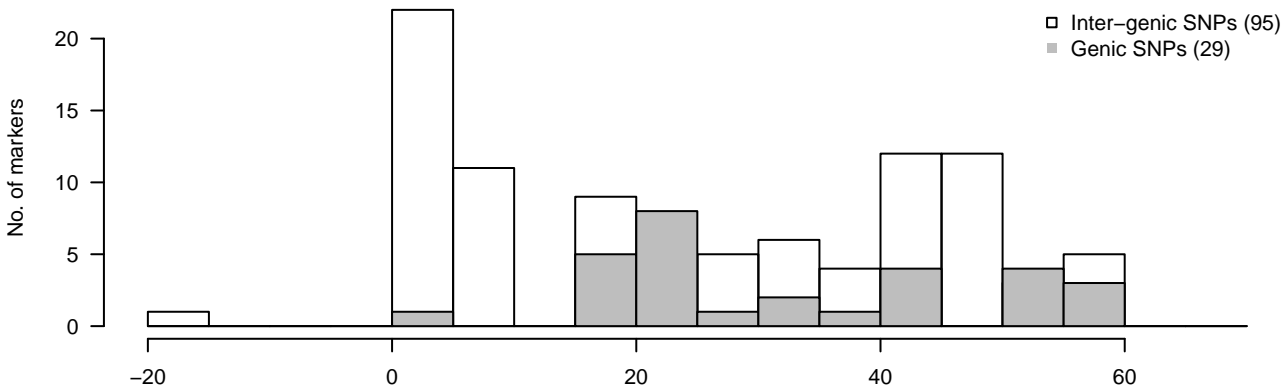

### 8A

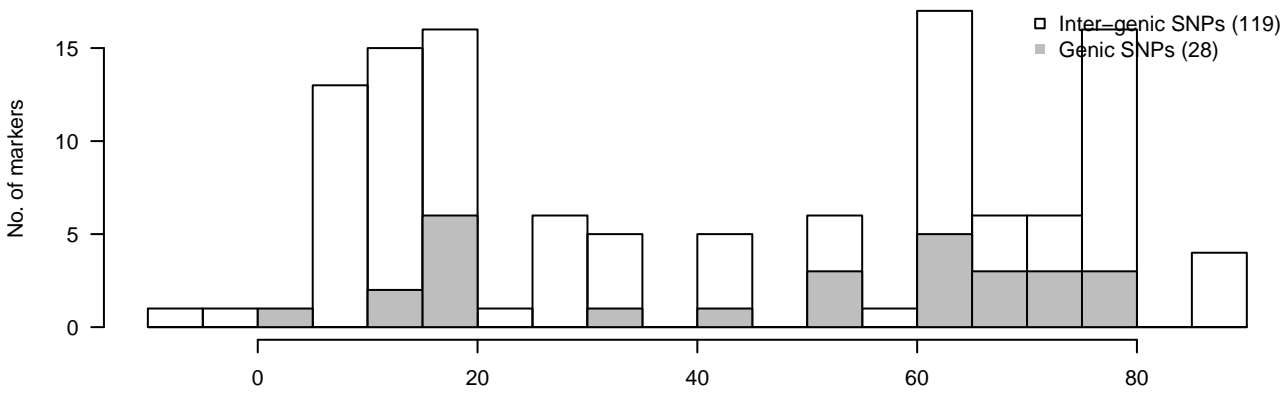

### 11A

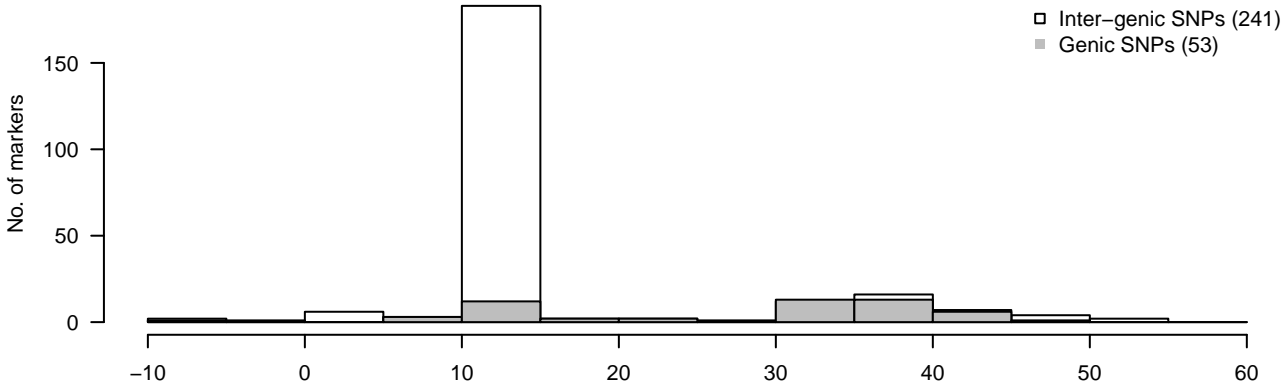

### 13A

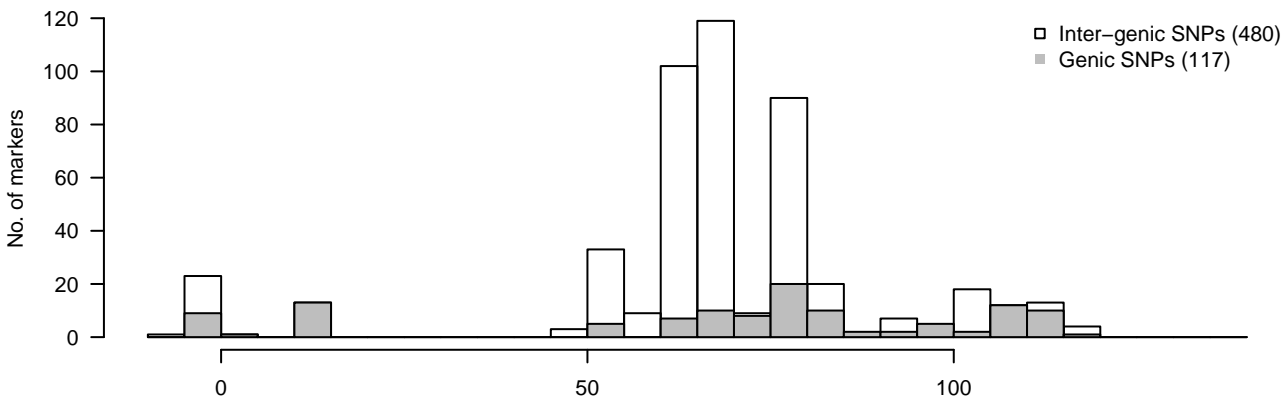

### 15A

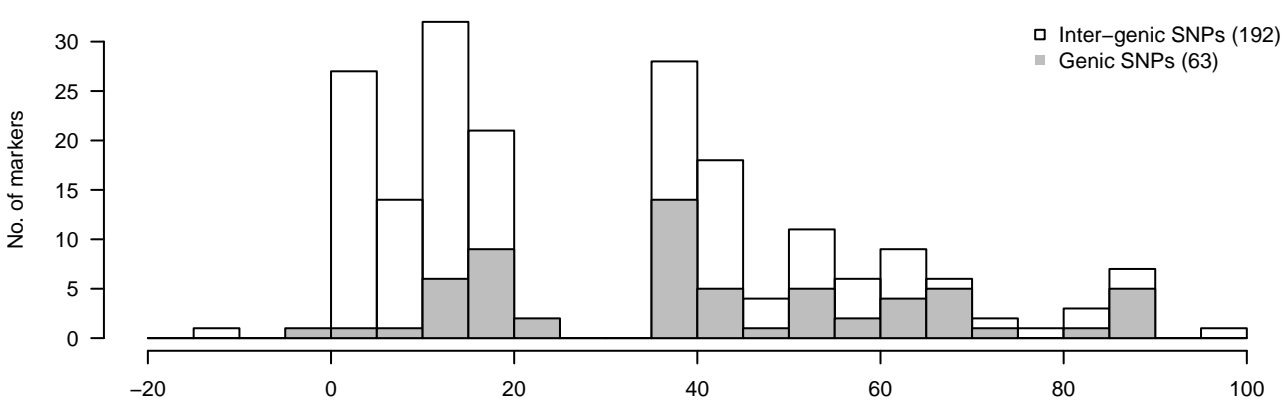

**16A**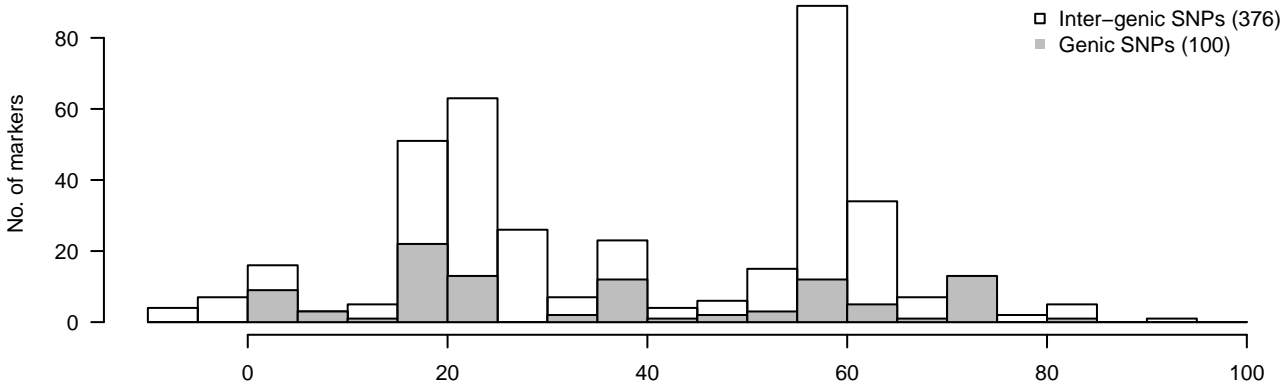**19A**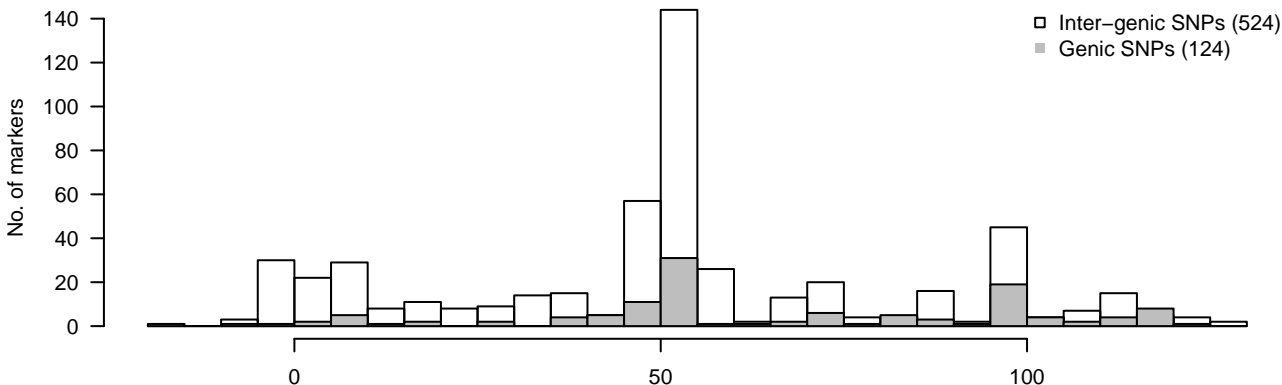**9D**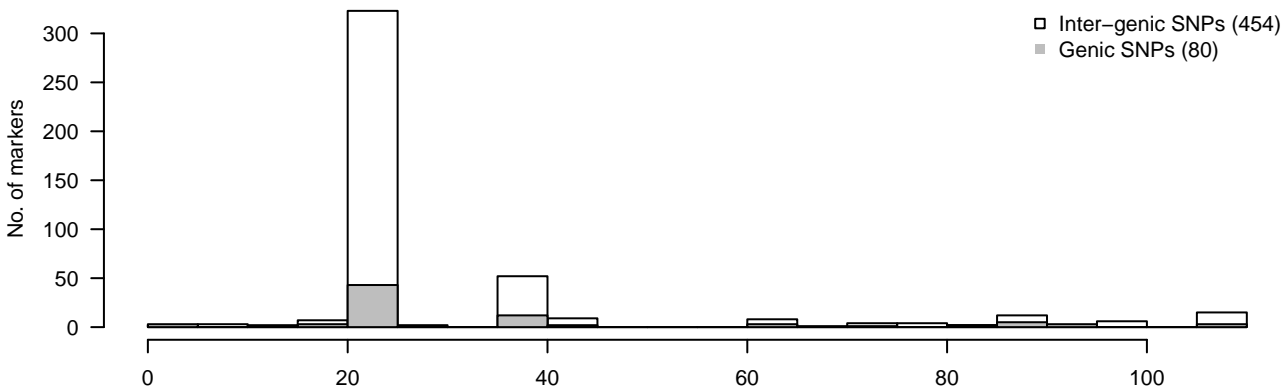

### 10D-F-1

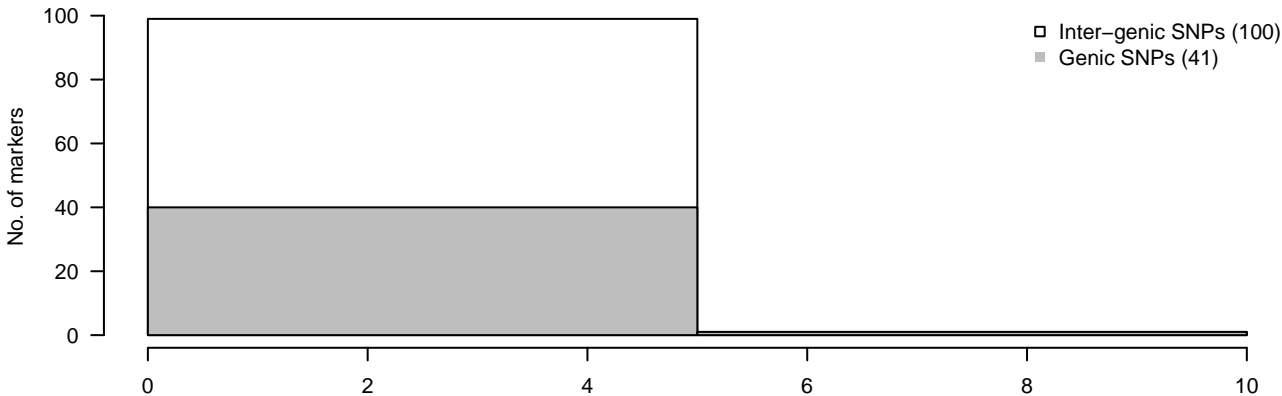

### 10D-F-2

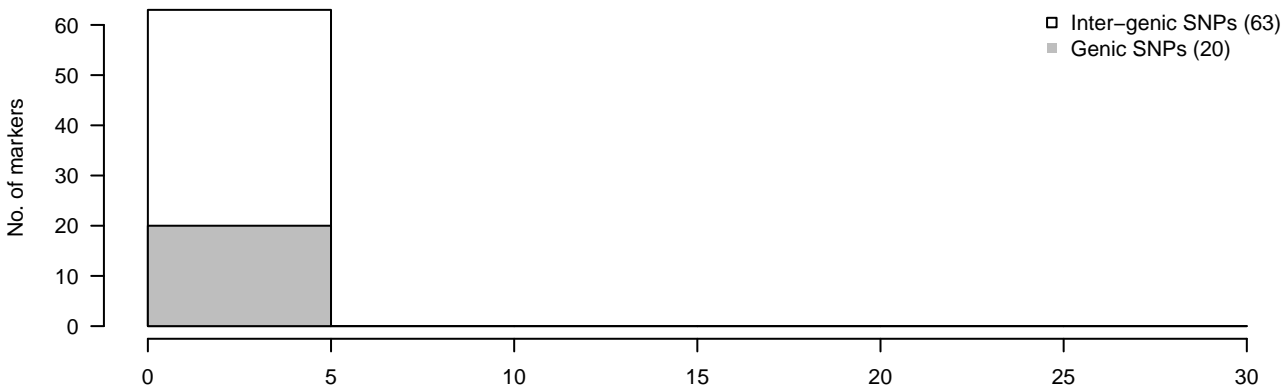

### 12D

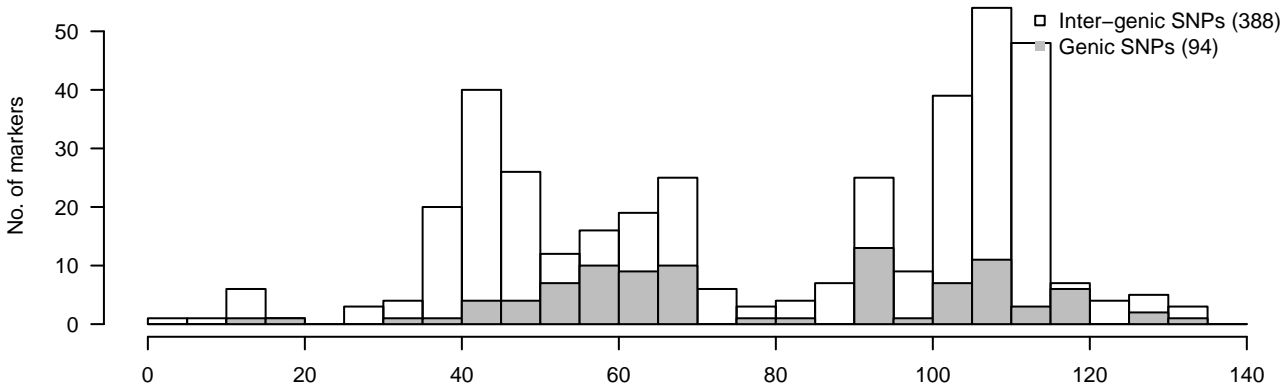

### 14D

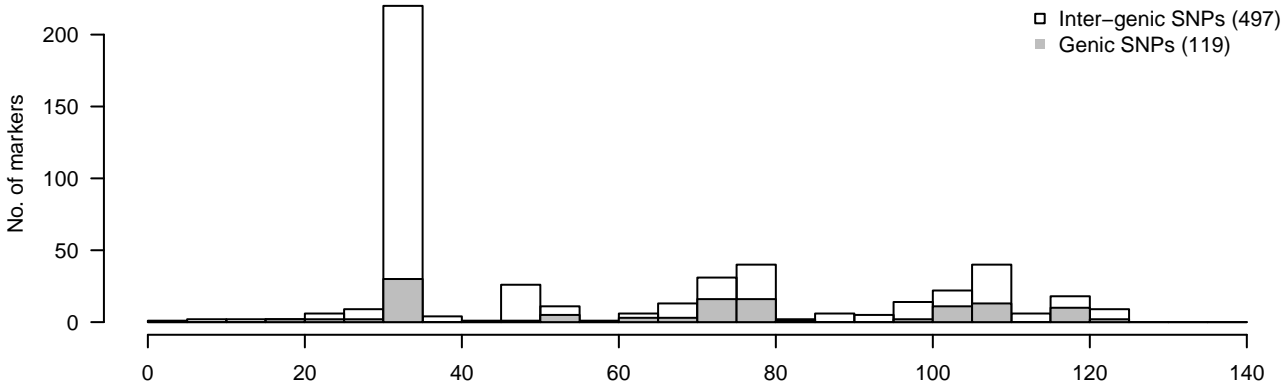

### 18D

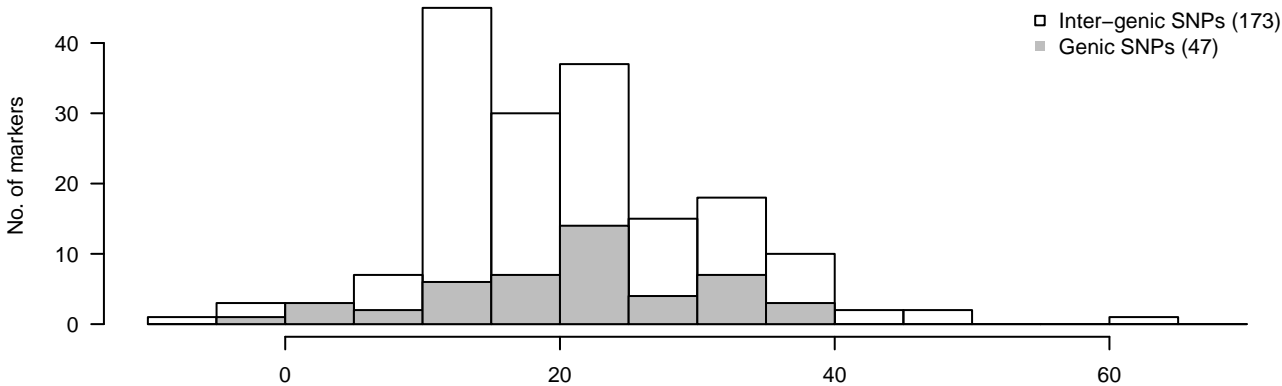

### 20D

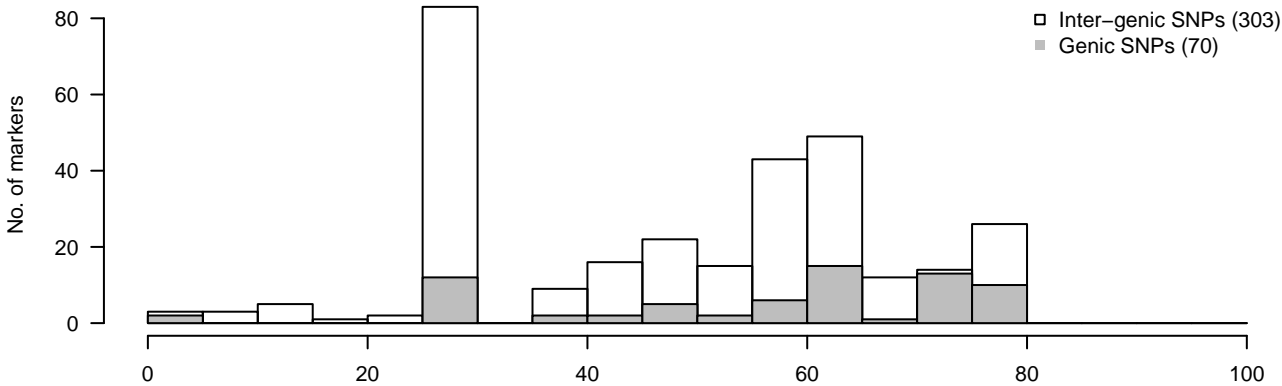

# 21D

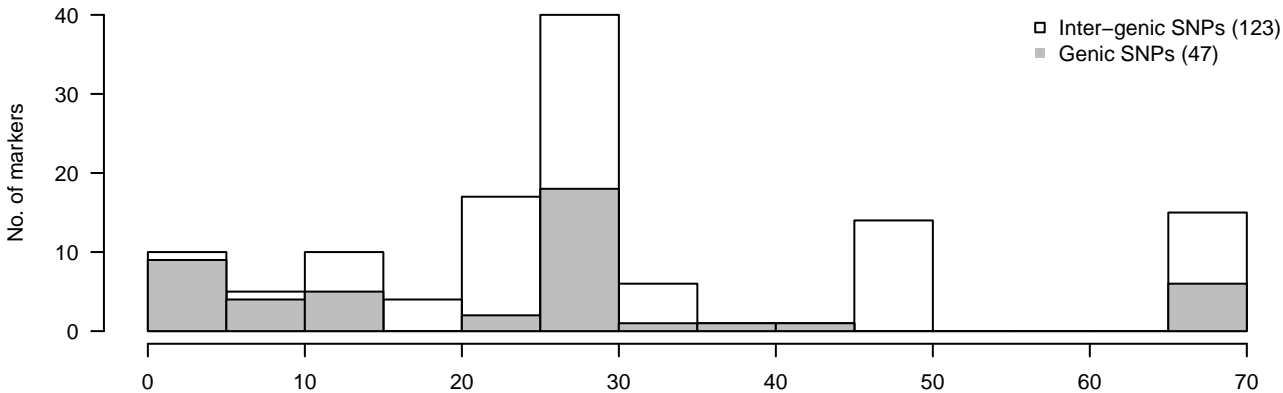

Supplement: pone.0102448.s017.pdf [file pone.0102448.s017.pdf]
