# Supplementary material for: Using Genotyping-By-Sequencing (GBS) for Genomic Discovery in Cultivated Oat
Source: PubMed Central journal article supplement (PMC4105502; doi:10.1371/journal.pone.0102448), 2014-07-21
Supplement: pone.0102448.s001.pdf [file pone.0102448.s001.pdf]

Open "HTML\_local\_text\_S2.html" in your favorite browser

Ctrl-F to search, and find your favorite marker

### Chromosome 5C

| Chr | Pos | Framework                          | Placed SNP                         | Placed GBS                                                                                                                                                            |
|-----|-----|------------------------------------|------------------------------------|-----------------------------------------------------------------------------------------------------------------------------------------------------------------------|
| 5C  | -16 |                                    |                                    | <a href="#">avgbs_52659</a> <a href="#">avgbs_21618</a>                                                                                                               |
| 5C  | -15 |                                    |                                    | <a href="#">avgbs_102165</a> <a href="#">avgbs_32759</a> <a href="#">avgbs_15178</a>                                                                                  |
| 5C  | -14 |                                    |                                    | <a href="#">avgbs_71135</a>                                                                                                                                           |
| 5C  | -13 |                                    |                                    | <a href="#">avgbs_213052</a>                                                                                                                                          |
| 5C  | -12 |                                    |                                    | <a href="#">avgbs_7199</a> <a href="#">avgbs_63268</a> <a href="#">avgbs_73244</a> <a href="#">avgbs_73245</a> <a href="#">avgbs_224566</a>                           |
| 5C  | -11 |                                    |                                    | <a href="#">avgbs_87990</a> <a href="#">avgbs_235486</a>                                                                                                              |
| 5C  | -10 |                                    |                                    | <a href="#">avgbs_110756</a> <a href="#">avgbs_6K_57836</a> <a href="#">avgbs_9090</a> <a href="#">avgbs_74977</a> <a href="#">avgbs_105828</a>                       |
| 5C  | -9  |                                    |                                    | <a href="#">avgbs_76024</a> <a href="#">avgbs_76025</a>                                                                                                               |
| 5C  | -8  |                                    | <a href="#">GMI_ES02_c5703_238</a> | <a href="#">avgbs_49703</a>                                                                                                                                           |
| 5C  | -7  |                                    |                                    | <a href="#">avgbs_109203</a> <a href="#">avgbs_223349</a> <a href="#">avgbs_34978</a>                                                                                 |
| 5C  | -5  |                                    |                                    | <a href="#">avgbs_94</a> <a href="#">avgbs_81402</a> <a href="#">avgbs_14041</a> <a href="#">avgbs_14042</a> <a href="#">avgbs_225390</a> <a href="#">avgbs_38195</a> |
| 5C  | -4  |                                    |                                    | <a href="#">avgbs_159</a>                                                                                                                                             |
| 5C  | -3  |                                    |                                    |                                                                                                                                                                       |
| 5C  | -2  |                                    |                                    |                                                                                                                                                                       |
| 5C  | -1  |                                    |                                    |                                                                                                                                                                       |
| 5C  | 0   | <a href="#">GMI_ES17_c5197_503</a> |                                    |                                                                                                                                                                       |

Click!

#### Marker passport: (opens in a new window)

- Target marker is highlighted in green
- Its approximated position on the framework is shown (CHR-POS)
- Recombination Fractions (RF) are actual informative counts
- RF are shown across all progeny and within populations
- Shows all markers within 20% RF of target marker in **any** population Even if they have been placed on a different consensus chromosome!

Is this a framework marker on the consensus map of Oliver et al., 2013 ?  
→ Y for "Yes", blank for "No".

| FW | MARKER                             | CHR | POS   | RF%-All | RF-All | RF%-Min | RF-Min | OP    | PG   | OT | KO | CH   | HZ |
|----|------------------------------------|-----|-------|---------|--------|---------|--------|-------|------|----|----|------|----|
|    | <a href="#">avgbs_71561</a>        | 1C  | 50.6  | 38.5    | 30/78  | 14.3    | 4/28   | 26/50 |      |    |    | 4/28 |    |
|    | <a href="#">avgbs_15178</a>        | 5C  | -14.8 | 0.0     | 0/26   | 0.0     | 0/26   |       |      |    |    | 0/26 |    |
|    | <a href="#">avgbs_213052</a>       | 5C  | -13.2 | 1.6     | 2/95   | 1.6     | 2/95   |       | 2/95 |    |    |      |    |
|    | <a href="#">avgbs_63268</a>        | 5C  | -12.2 | 1.4     | 1/74   | 1.4     | 1/74   |       | 1/74 |    |    |      |    |
|    | <a href="#">avgbs_224566</a>       | 5C  | -11.8 | 3.0     | 1/33   | 3.0     | 1/33   |       |      |    |    | 1/33 |    |
|    | <a href="#">avgbs_7199</a>         | 5C  | -11.6 | 1.8     | 2/82   | 1.8     | 2/82   |       | 2/82 |    |    |      |    |
|    | <a href="#">avgbs_87990</a>        | 5C  | -11.5 | 5.7     | 4/61   | 5.7     | 4/61   |       | 4/61 |    |    |      |    |
|    | <a href="#">avgbs_110756</a>       | 5C  | -10.3 | 5.2     | 6/116  | 5.1     | 4/78   | 4/78  |      |    |    | 2/38 |    |
|    | <a href="#">avgbs_6K_57836</a>     | 5C  | -10.3 | 1.7     | 1/68   | 1.7     | 1/68   |       | 1/68 |    |    |      |    |
|    | <a href="#">avgbs_74977</a>        |     |       |         |        |         |        |       |      |    |    |      |    |
|    | <a href="#">avgbs_9090</a>         |     |       |         |        |         |        |       |      |    |    |      |    |
|    | <a href="#">avgbs_105828</a>       |     |       |         |        |         |        |       |      |    |    |      |    |
|    | <a href="#">avgbs_76024</a>        |     |       |         |        |         |        |       |      |    |    |      |    |
|    | <a href="#">avgbs_76025</a>        |     |       |         |        |         |        |       |      |    |    |      |    |
|    | <a href="#">avgbs_49703</a>        |     |       |         |        |         |        |       |      |    |    |      |    |
|    | <a href="#">GMI_ES02_c5703_238</a> | 5C  | -7.7  |         |        |         |        |       |      |    |    |      |    |

#### For example:

GMI\_ES02\_c5703\_238 is linked to avgbs\_110756 with **6/116** recombinants across all populations and **4/78** recombinants in the OP population (min RF).  
GMI\_ES02\_c5703\_238 is also linked to avgbs\_71561 in CH population but is placed to chromosome 1C across all available populations.
