# Supplementary material for: Using Genotyping-By-Sequencing (GBS) for Genomic Discovery in Cultivated Oat
Source: PLoS One. 2014 Jul 21;9(7):e102448. doi: 10.1371/journal.pone.0102448 (PMC4105502; doi:10.1371/journal.pone.0102448)
Supplement: Table S3 — Information about the lines comprising the IOI panel. (XLSX) [file pone.0102448.s020.xlsx]

## Sheet: Table_S3_IOI_panel
GID #: unique identifier in Pedigree of Oat lines (POOL); Location is assigned according to the original breeding program and the provenance of parental lines
Line_name	GID	Habit	Naked-Covered	Location	Region
06FL328	18009	S	C	Canada	North America
06FL930	18008	S	C	Canada	North America
96-21Cn19	18012	W	C	UK	Europe
Aarre	6370	S	C	Finland	Europe
Abel (Mozart)	6366	S	N	Czech Republic	Europe
Aberglen	7514	S	C	UK	Europe
AC Assiniboia	2663	S	C	Canada	North America
AC Aylmer	92	S	C	Canada	North America
AC Baton	370	S	N	Canada	North America
AC Belmont	3879	S	N	Canada	North America
AC Francis	41	S	C	Canada	North America
AC Gwen	3943	S	N	Canada	North America
AC Marie	3945	S	C	Canada	North America
AC Medallion	339	S	C	Canada	North America
AC Morgan	3946	S	C	Canada	North America
AC Pinnacle	3948	S	C	Canada	North America
AC Rigodon	13	S	C	Canada	North America
AC Ronald	3950	S	C	Canada	North America
AC Stewart	270	S	C	Canada	North America
Ajax	558	S	C	Unknown	Unknown
Akiyutaka	9197	S	C	Japan	Asia
Akt	7503	S	N	Poland	Europe
Alf	13659	S	C	Germany	Europe
Alo	11592	S	C	Estonia	Europe
Amagalon/4*Ogle	5330	S	C	USA	North America
Amigo	7478	S	C	UK	Europe
Amisade	18788	S	C	Unknown	Unknown
Aragon	7548	S	C	Germany	Europe
Ardo	7506	S	C	Czech Republic	Europe
Asb801 3-122	18802	S	C	Canada	North America
Asencao	5341	S	C	Brazil	South America
Assiniboia/S42	18023	S	C	Canada	North America
Astra	13827	S	C	Italy	Europe
Atego	7778	S	C	Czech Republic	Europe
Atlas 14535	18789	S	C	Unknown	Unknown
Aurora	5508	S	C	USA	North America
Auteuil	7495	S	C	France	Europe
AVE378	14415	S	N	Germany	Europe
Aveia	364	S	C	Unknown	Unknown
Aveny	16722	S	C	Sweden	Europe
Avesta	11593	S	C	Austria	Europe
Bajka	7504	S	C	Poland	Europe
Bakonyalja	11594	S	C	Hungary	Europe
Baragan 114	22	S	C	Romania	Europe
Barra	7508	S	C	Sweden	Europe
Belinda	7499	S	C	Sweden	Europe
Belle	6372	S	C	USA	North America
Birgitta	7511	S	C	Sweden	Europe
Black	0	S	C	France	Europe
Blanche du Vieux Moulin	5853	S	C	Belgium	Europe
Blaze	7411	S	C	USA	North America
Boog	11596	S	C	Unknown	Unknown
Borowiak	11597	S	C	Poland	Europe
Boudrias	3891	S	N	Canada	North America
Bountiful	16111	S	C	UK	Europe
Boxer	11740	S	C	Germany	Europe
Brawn	7412	S	C	USA	North America
Buckskin	14795	S	C	USA	North America
Buffalo	7481	W	C	UK	Europe
Bullion	7372	S	N	UK	Europe
Calibre	3522	S	C	Canada	North America
Capa	6111	S	C	USA	North America
Capital	2140	S	C	Canada	North America
Caracas	11600	S	C	Germany	Europe
Cascade	3934	S	C	Canada	North America
CDC Baler	6374	S	C	Canada	North America
CDC Boyer	3502	S	C	Canada	North America
CDC Dancer	3956	S	C	Canada	North America
CDC Orrin	5800	S	C	Canada	North America
CDC Pacer	3509	S	C	Canada	North America
CDC ProFi	11872	S	C	Canada	North America
CDC SO-1	14828	S	C	Canada	North America
CDC Sol-Fi	9182	S	C	Canada	North America
CDC Weaver	8596	S	C	Canada	North America
Ceirch Llwyd	7923	S	C	UK	Europe
Centennial	6397	S	C	USA	North America
Chambord	11764	S	C	France	Europe
Chantilly	7496	S	C	France	Europe
Chaps	6414	S	C	USA	North America
Charlton	11602	S	C	Unknown	Unknown
Chernigovskij	16167	S	C	Ukraine	Europe
Chernigovskij 27A	0	S	C	Unknown	Unknown
Chernigovskij 27B	11603	S	C	Ukraine	Europe
Cherokee	5866	S	C	Unknown	Unknown
CIav 2014	1070	W	C	Spain	Europe
CIav 6195	18772	S	C	Unknown	Unknown
CIav 6200	18773	S	C	Unknown	Unknown
CIav 6209	18774	S	C	Unknown	Unknown
CIav 9231	18776	S	C	Unknown	Unknown
CIav602	18754	S	C	Unknown	Unknown
Cilla	11767	S	C	Sweden	Europe
Clintford	5390	S	C	USA	North America
Clintland 64	5874	S	C	USA	North America
Clinton	2543	S	C	USA	North America
Coach	7545	S	C	Germany	Europe
Coker 227	5460	F	C	USA	North America
Coker 234	2223	W	C	USA	North America
Coker 833	6861	F	C	USA	North America
CROA_11	18785	S	C	Unknown	Unknown
Dal	3993	S	C	USA	North America
Dane	4043	S	C	USA	North America
Detvan	11586	S	N	Slovakia	Europe
Dominik	11782	S	C	Germany	Europe
Dominik (Bauer)	11782	S	C	Germany	Europe
Doris	6563	S	C	Sweden	Europe
Dragon	7501	S	C	Poland	Europe
Drummond	16838	S	C	UK	Europe
Dukat	11604	S	C	Poland	Europe
Early Mountain	9593	S	C	Unknown	Unknown
Ebene	11605	S	C	France	Europe
Edmund	11608	S	C	Austria	Europe
Edo	7605	S	C	Austria	Europe
Eva_1	11616	S	N	Unknown	Unknown
Event	11617	S	C	Germany	Europe
Evita	11800	S	C	Germany	Europe
Exeter	1113	S	C	Canada	North America
Expander	7492	S	C	Austria	Europe
Expo	7600	S	C	Austria	Europe
Firth	11814	S	C	Germany	Europe
FL Aura	18777	S	C	Unknown	Unknown
Flaemingslord	11619	S	C	Germany	Europe
Flaemingsnova	7603	S	C	Germany	Europe
Flaemingsplus	11620	S	C	Germany	Europe
Flaemingsprofi	11820	S	C	Germany	Europe
Flaemingsstern	6007	S	C	Germany	Europe
Flaemingstip	11821	S	C	Germany	Europe
Flipper	11622	S	C	Germany	Europe
Florida 501	6835	F	C	USA	North America
Ford Early Giant	18778	S	C	Unknown	Unknown
Freddy	7550	S	C	Germany	Europe
Freja	7497	S	C	Sweden	Europe
Fulghum	2533	F	C	USA	North America
Furlong	7150	S	C	Canada	North America
Garry	588	S	C	Canada	North America
Gem	2661	S	C	USA	North America
Gemini	589	S	C	Canada	North America
Gerkules	11625	S	C	Russia	Russia
GK_Pillango	11627	S	C	Hungary	Europe
Goslin	363	S	C	Canada	North America
H927.1.6.1.x.x.24	18790	S	C	USA	North America
Hamel	11844	S	C	France	Europe
Hazel	1262	S	C	USA	North America
Hdaka	0	S	C	Japan	Asia
HiFi	7407	S	C	USA	North America
Hinoat	54	S	C	Canada	North America
IA91400-2-3	11628	S	C	USA	North America
IA93227-1	11629	S	C	USA	North America
IAH611-447	18760	S	C	Unknown	Unknown
IL00-7267	14792	S	C	USA	North America
IL02-8658	18022	S	C	USA	North America
IL2858-1	18017	S	C	USA	North America
IL86-5262	14763	S	C	USA	North America
IL86-5698-3	18015	S	C	USA	North America
IL97-19239	18014	S	N	USA	North America
IL9810145	18013	S	C	USA	North America
Iltis	11630	S	C	Germany	Europe
Irtysh_13	11631	S	C	Unknown	Unknown
Ivory	14402	S	C	Germany	Europe
Ivory (Nordsaat)	14402	S	C	Germany	Europe
Jay	6173	S	C	USA	North America
Jerry	6627	S	C	USA	North America
Jordan	14802	S	C	Canada	North America
Jordan (JMF)	14802	S	C	Canada	North America
Jumbo	7490	S	C	Germany	Europe
Kangaroo	15139	F	C	Australia	Australia
Kanota	5389	F	C	USA	North America
Kanton	11858	S	C	Germany	Europe
Katri	7538	S	C	Finland	Europe
Kaufman	8718	S	C	Canada	North America
Kermit	11638	S	C	Germany	Europe
Klein 69B	0	S	C	Argentina	South America
Kolpashevskii	11639	S	C	Russia	Russia
Komes	12579	S	C	Poland	Europe
Korwood	8240	S	C	USA	North America
Kwant	11640	S	C	Poland	Europe
Lamar	3926	S	C	Canada	North America
Lampton	6019	S	C	Australia	Australia
Lang	6618	S	C	USA	North America
LAO-1055	18759	S	C	Canada	North America
LAO-612-039	18766	S	N	Canada	North America
Laurel	0	S	N	Unknown	Unknown
Leggett	16059	S	C	Canada	North America
Lisbeth	6367	S	N	Finland	Europe
Litoral	11641	S	C	Unknown	Unknown
Lochow 7770	18779	S	C	Unknown	Unknown
Lokhovsky	18780	S	C	Unknown	Unknown
Longchamp	11642	S	C	France	Europe
Lutz	7491	S	C	Germany	Europe
Lvovskii_Rannii	12594	S	C	Ukraine	Europe
Maldwyn	7922	S	C	UK	Europe
MAM 17-5	8352	S	C	USA	North America
Manotick	3382	S	C	Canada	North America
Mantaro_15	11643	S	C	Peru	South America
Mara	11644	S	C	Lithuania	Europe
Marathon	6044	S	C	USA	North America
Marion (Canada)	7	S	C	Canada	North America
Mascani	11911	W	C	Unknown	Unknown
Matilda	7369	S	C	Sweden	Europe
Matra	8287	S	C	Netherlands	Europe
Melys	7515	S	C	UK	Europe
MF9522-523	17779	S	C	USA	North America
Millennium	7472	W	C	UK	Europe
Milton	6614	S	C	USA	North America
MN 811045	18791	S	C	Unknown	Unknown
MN 843896	18792	S	C	Unknown	Unknown
MN841801-1	15153	S	C	USA	North America
Mortlock	5016	F	C	Australia	Australia
Morton	7408	S	C	USA	North America
N327-6	18002	S	Unknown	USA	North America
Nakota	6080	S	N	USA	North America
Neklan	7546	S	C	Czech Republic	Europe
Nelson	0	S	C	Germany	Europe
Newman	204	S	C	Canada	North America
NO58-2-75-26	3456	S	N	Canada	North America
Noble-2	15154	S	C	USA	North America
Nora	7610	F	C	USA	North America
Novojatkovo	18781	S	C	Unknown	Unknown
OA1063-8	7708	S	C	Canada	North America
OA1079-1	9669	S	C	Canada	North America
OA1188-1	16670	S	C	Canada	North America
OA1197-2	16694	S	C	Canada	North America
OA516-2	1155	S	C	Canada	North America
Ogle	66	S	C	USA	North America
Omskij 6922	36	S	C	Russia	Russia
Orlik	11650	S	C	Sweden	Europe
OT_286	6395	S	C	Canada	North America
OT_289	8602	S	C	Canada	North America
OT2040	14822	S	C	Unknown	Unknown
OT2045	18767	S	C	Unknown	Unknown
OT2048	18768	S	C	Canada	North America
OT380	7110	S	C	Canada	North America
OT586	14840	S	C	Unknown	Unknown
Otana	3990	S	C	USA	North America
Pajaz	18786	S	C	Unknown	Unknown
Pal	11651	S	C	USA	North America
Pc100_temp	0	S	C	Canada	North America
Pc101_temp	0	?	C	Canada	North America
Pc68/5*Starter	18797	S	C	USA	North America
Pc97_temp	0	?	C	Canada	North America
Pc98_temp	0	S	C	Canada	North America
Petra	11659	S	C	Sweden	Europe
Pg11	5260	S	C	Canada	North America
Pg16	5281	S	C	Unknown	Unknown
Pharao	11660	S	C	Austria	Europe
PI 207012	18782	S	C	Unknown	Unknown
PI 258540B	0	S	C	Unknown	Unknown
PI 258635	18755	S	C	Unknown	Unknown
PI 258703	0	S	C	Unknown	Unknown
PI 269-181	18783	S	C	Unknown	Unknown
Pony	11661	S	C	Germany	Europe
Powell	7977	S	C	USA	North America
Prescott	2369	S	C	Canada	North America
Proat	10590	S	C	USA	North America
Provena	7976	S	N	USA	North America
Puhti	7539	S	C	Finland	Europe
Pulawski	0	S	C	Sweden	Europe
Pusa Hybrid G	13221	S	C	India	Asia
Quincy No. 76-9-17	18793	S	C	Unknown	Unknown
Radius	7832	S	C	Czech Republic	Europe
Ranch	6932	S	C	France	Europe
red oat selection (CIav 3988)	18794	S	C	Unknown	Unknown
Red Rustproof	2537	W	C	USA	North America
Revisor	7494	S	C	Germany	Europe
Richard	5173	S	C	USA	North America
Riel	2693	S	C	Canada	North America
Robert	2138	S	C	Canada	North America
Robust	10803	S	C	USA	North America
Rodney 0	5268	S	C	Unknown	Unknown
Roope	7507	S	C	Finland	Europe
Russell	619	S	C	Canada	North America
S.A. 6	18795	W	C	Unknown	Unknown
SA99572	18004	S	C	Canada	North America
Salomon	7556	S	N	Germany	Europe
Sang	6882	S	C	Sweden	Europe
Sanova	11671	S	C	Germany	Europe
Santa Fe	5347	S	C	Argentina	South America
Sesqui	7483	S	C	USA	North America
Shadow	17318	S	N	Canada	North America
Sherwood	2364	S	C	Canada	North America
Sidabres	11682	S	C	Lithuania	Europe
Silva selection	15057	W	C	USA	North America
Sinelnikovski_1321	18787	S	C	Unknown	Unknown
Sisko	6371	S	C	Finland	Europe
Skakun	11599	S	C	Sweden	Europe
Skrzat	14404	S	C	Poland	Europe
Spurs	6465	S	C	USA	North America
Stanton	0	S	C	Unknown	Unknown
Starter	4048	S	C	USA	North America
Stout	5406	S	C	USA	North America
Sun II-1	18075	S	C	Sweden	Europe
Sutton	9114	S	C	Canada	North America
SW Betania	13727	S	C	Sweden	Europe
SW Kerstin	16723	S	C	Sweden	Europe
Sylva	3972	S	C	Canada	North America
TAM O-301	2221	F	C	USA	North America
TAM O-312	2222	S	C	USA	North America
TAM-O397	8068	F	C	USA	North America
Tartarian	0	S	C	Unknown	Unknown
Terra	412	S	N	Canada	North America
Triple Crown	3518	S	C	Canada	North America
Trispernia	3995	W	C	Romania	Europe
Troy	8038	S	C	USA	North America
UFRGS 8	8069	S	C	Canada	North America
UFRGS 881971	8064	S	C	Brazil	South America
UFRGS 930605	8070	S	C	Brazil	South America
UFRGS 9912002-2	18753	S	C	Brazil	South America
Ukraine	4023	S	C	Ukraine	Europe
Ukraine reselectio	7449	S	C	USA	North America
Urano	11683	S	C	Chile	South America
Ursus	11684	S	C	Unknown	Unknown
VAO-10	17004	S	N	Canada	North America
VAO-22	16786	S	N	Canada	North America
VAO-44	18005	S	N	Canada	North America
VAO-45	18059	S	N	Canada	North America
VAO-46	18011	S	N	Canada	North America
VAO-48	18749	S	N	Canada	North America
Veli	7500	S	C	Finland	Europe
Ventura	0	S	C	Unknown	Unknown
Verde	18796	S	C	USA	North America
Vicar	0	S	N	Unknown	Unknown
Victor	5462	S	C	UK	Europe
Victoria	0	S	C	Uruguay	South America
Viker	11685	S	C	Unknown	Unknown
Virma	7541	S	C	Finland	Europe
Vista	6376	S	C	USA	North America
W00030	18762	S	C	Canada	North America
W00031	18763	S	C	Canada	North America
W00032	18764	S	C	Canada	North America
W00033	18765	S	C	Canada	North America
W95116	7100	S	C	Canada	North America
WAOAT2132	18756	S	C	Australia	Australia
WAOAT2133	18757	S	C	Australia	Australia
WAOAT2134	18758	S	C	Australia	Australia
Webster	10219	S	C	USA	North America
Whitestone	7415	S	C	USA	North America
Winston	11686	S	C	Germany	Europe
Wisc. X-1588	18752	S	C	USA	North America
X466	10231	S	C	USA	North America
Z615-4	16467	S	C	Unknown	Unknown
Zvolen	11687	S	C	Slovakia	Europe
